# Supplementary material for: Global high resolution monthly pCO 2 climatology for the coastal ocean derived from neural network interpolation
Source: Copernicus journal article supplement (doi:10.5194/bg-2017-64), 2017-02-24
Supplement: Supplementary file 1 [file bg-2017-64-supplement.zip]

1    **Below: Figures for Supplementary Information**

2    Figure SI 1: Monthly averaged spatial extent of the different biogeochemical provinces  
3    generated by the SOM.

4    Figure SI 2: Climatological monthly averaged  $p\text{CO}_2$  reconstructed by the artificial neural  
5    network method SOM-FFN.

6    Figure SI 3: Climatological monthly averaged  $p\text{CO}_2$  generated by the artificial neural network  
7    SOM-FFN method for the Arctic regions. The red line represents the edge of the sea ice cover.

8  
9

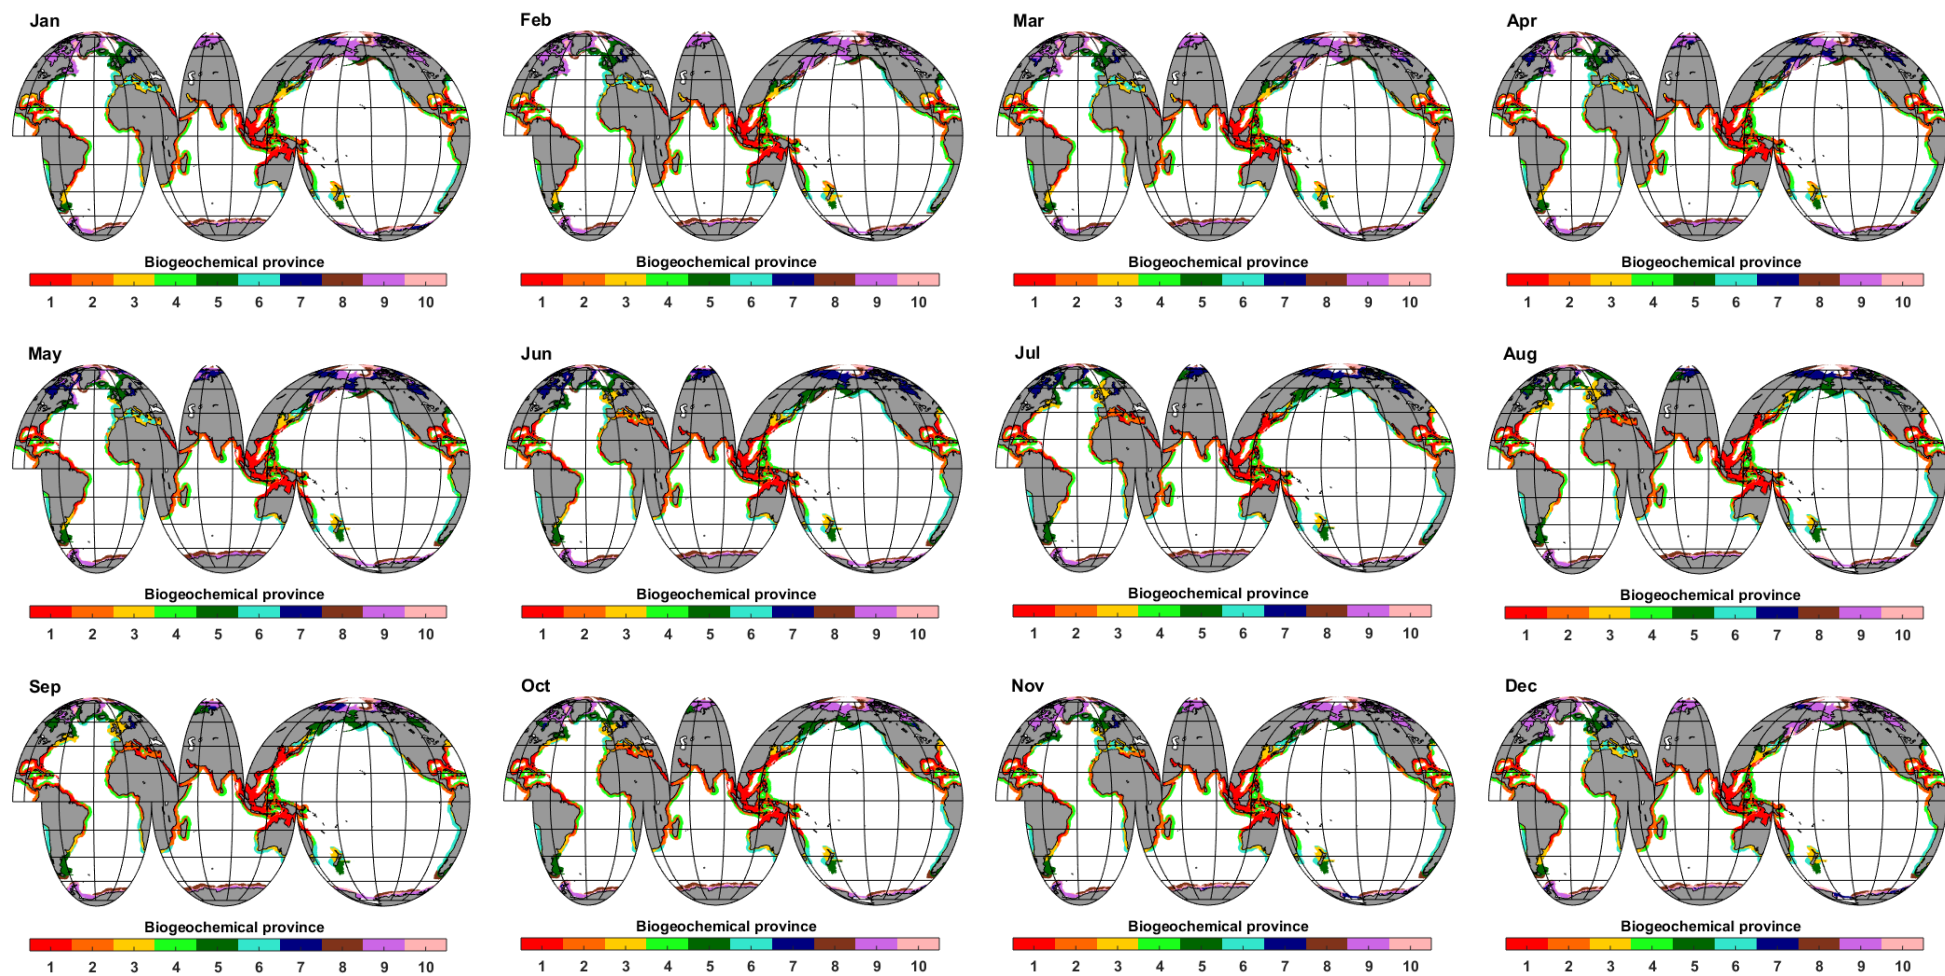

**Figure SI 1**

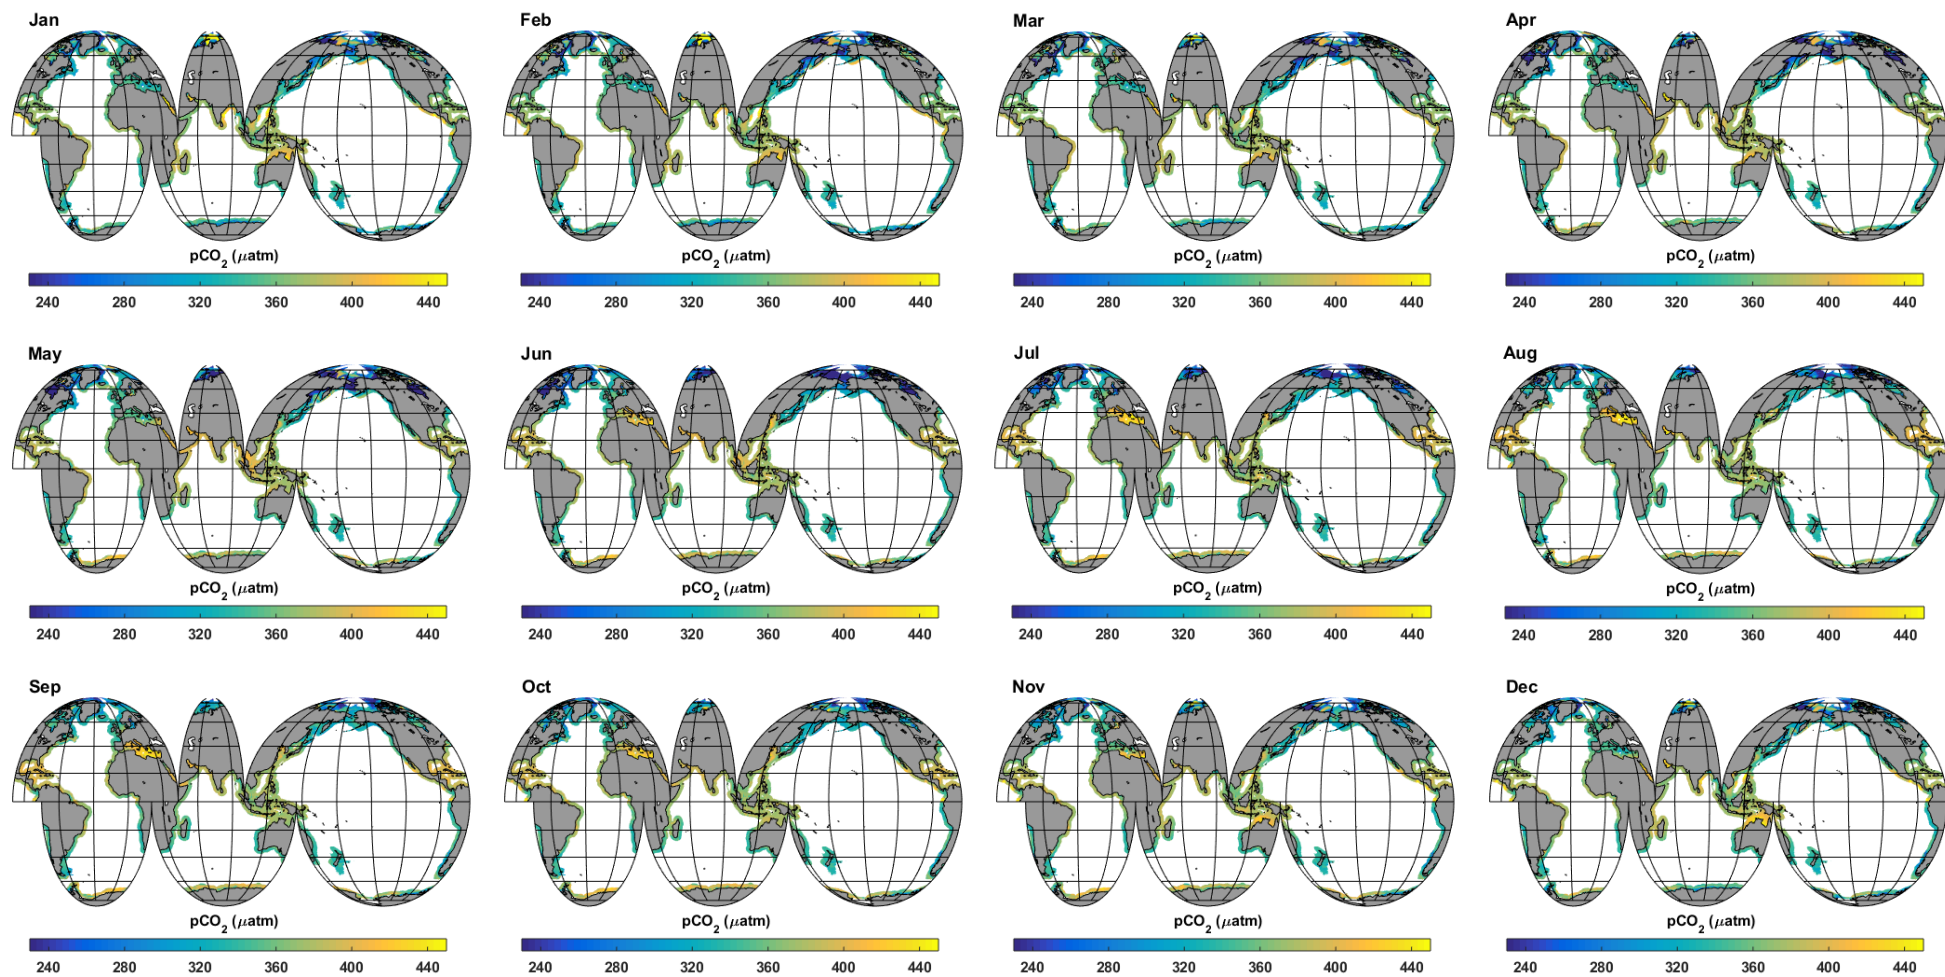

Figure SI 2



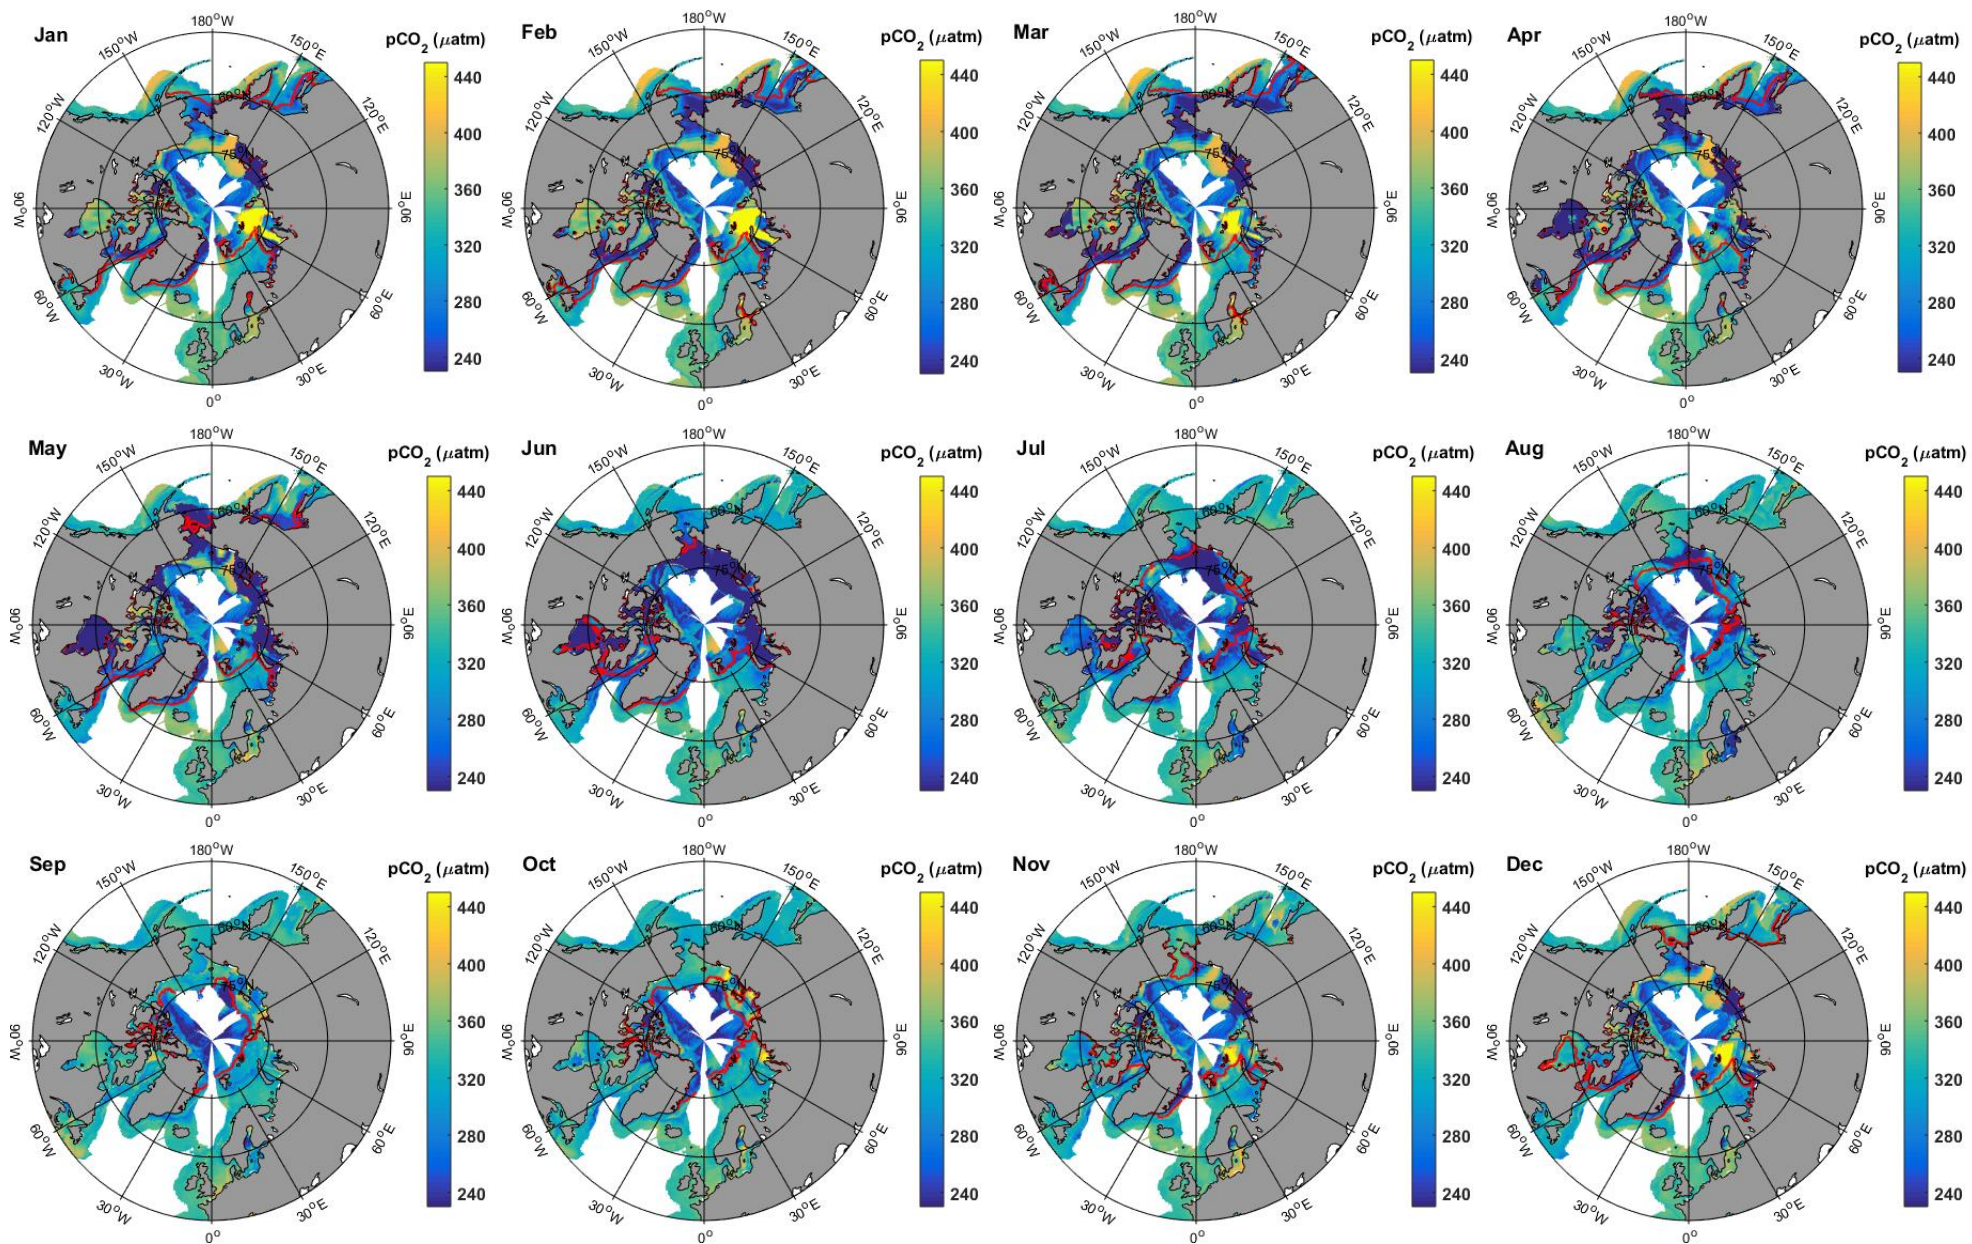

Figure SI 3
